# Supplementary material for: Smoking Patterns and Smoking Cessation Willingness—A Study among Beneficiaries of Government Welfare Assistance in Poland
Source: MDPI journal article supplement (doi:10.3390/ijerph14020131), 2017-01-27
Supplement: s1 [file s1]

# Supplementary Materials: Smoking Patterns and Smoking Cessations Willingness—A Study among Beneficiaries of Government Welfare Assistance in Poland

Katarzyna Milcarz, Teresa Makowiec-Dąbrowska, Leokadia Bak-Romaniszyn and Dorota Kaleta

**Table S1.** Distribution of adults ≥15 years old by selected demographic characteristics—GATS Poland, 2009–2010 \*.

| Variable                                                                                                                                                 | Number of Adults<br><i>n</i> (Overall <i>n</i> =<br>7840) | Percentage | (95% CI)    |
|----------------------------------------------------------------------------------------------------------------------------------------------------------|-----------------------------------------------------------|------------|-------------|
| Gender                                                                                                                                                   |                                                           |            |             |
| Male                                                                                                                                                     | 3867                                                      | 47.7       | (46.2–49.3) |
| Female                                                                                                                                                   | 3973                                                      | 52.3       | (50.7–53.8) |
| Age (years)                                                                                                                                              |                                                           |            |             |
| 15–19                                                                                                                                                    | 362                                                       | 7.7        | (6.8–8.6)   |
| 20–29                                                                                                                                                    | 1306                                                      | 19.5       | (18.2–20.8) |
| 30–39                                                                                                                                                    | 1516                                                      | 17.0       | (16.1–18.0) |
| 40–49                                                                                                                                                    | 1348                                                      | 16.6       | (15.7–17.6) |
| 50–59                                                                                                                                                    | 1441                                                      | 17.1       | (16.0–18.2) |
| 60+                                                                                                                                                      | 1867                                                      | 22.2       | (21.0–23.5) |
| Residence                                                                                                                                                |                                                           |            |             |
| Rural                                                                                                                                                    | 4012                                                      | 38.0       | (37.2–38.8) |
| Urban                                                                                                                                                    | 3828                                                      | 62.0       | (61.2–62.8) |
| Up to 50,000                                                                                                                                             | 1441                                                      | 40.1       | (33.7–46.9) |
| 50000–200,000                                                                                                                                            | 981                                                       | 24.8       | (19.6–30.9) |
| Over 200,000                                                                                                                                             | 1406                                                      | 35.1       | (29.1–41.5) |
| Education Level                                                                                                                                          |                                                           |            |             |
| Primary                                                                                                                                                  | 1630                                                      | 20.0       | (18.8–21.3) |
| Vocational                                                                                                                                               | 2092                                                      | 24.8       | (23.6–26.0) |
| Secondary                                                                                                                                                | 2951                                                      | 40.0       | (38.5–41.5) |
| High                                                                                                                                                     | 1142                                                      | 15.2       | (14.1–16.3) |
| Employment status                                                                                                                                        |                                                           |            |             |
| Hired employee employed in a company enterprise–based on employment contract or contract self–employed; owner or co–owner of a company or helping spouse | 3530                                                      | 45.2       | (44.1–46.3) |
| Person keeping his/her own farm owner or co–owner of a farm or helping spouse on a farm                                                                  | 390                                                       | 5.0        | (4.5–5.5)   |
| Pupil student                                                                                                                                            | 565                                                       | 7.2        | (6.6–7.8)   |
| Person occupied with household keeping raising children/homemaker                                                                                        | 526                                                       | 6.7        | (6.2–7.3)   |
| Retiree                                                                                                                                                  | 1878                                                      | 24.1       | (23.2–25.1) |
| Pensioner                                                                                                                                                | 480                                                       | 6.2        | (5.7–6.7)   |
| Unemployed currently with no permanent job                                                                                                               | 433                                                       | 5.6        | (5.1–6.1)   |
| Monthly income                                                                                                                                           |                                                           |            |             |
| Less than 1000 PLN                                                                                                                                       | 2013                                                      | 25.7       | (24.7–26.7) |
| From 1000 –1500 PLN                                                                                                                                      | 1524                                                      | 19.4       | (18.5–20.3) |
| From 1501–2000 PLN                                                                                                                                       | 1050                                                      | 13.4       | (12.7–14.2) |

|                                                                             |      |      |             |
|-----------------------------------------------------------------------------|------|------|-------------|
| From 2001–3000 PLN                                                          | 809  | 10.3 | (9.6–11.0)  |
| Over 3000 PLN                                                               | 547  | 7.0  | (6.4–7.6)   |
| I do not know                                                               | 183  | 2.3  | (2.0–2.6)   |
| Refused                                                                     | 1714 | 21.9 | (21.0–22.8) |
| Awareness of smoking health consequences                                    |      |      |             |
| Yes                                                                         | 7127 | 95.3 | (94.8–95.8) |
| No                                                                          | 348  | 4.7  | (4.2–5.2)   |
| Exposure to environmental tobacco smoke                                     |      |      |             |
| At home                                                                     | 4879 | 62.4 | (61.3–63.5) |
| Among respondents who work indoors and are exposed to tobacco smoke at work | 1742 | 53.7 | (52.6–54.8) |

\* Available from [http://www.who.int/tobacco/surveillance/en\\_tfi\\_gats\\_poland\\_report\\_2010.pdf](http://www.who.int/tobacco/surveillance/en_tfi_gats_poland_report_2010.pdf).
